# Supplementary material
Source: PubMed Central journal article supplement (PMC545816)
Supplement: 7600529s2.pdf [file 7600529s2.pdf]

Figure 1

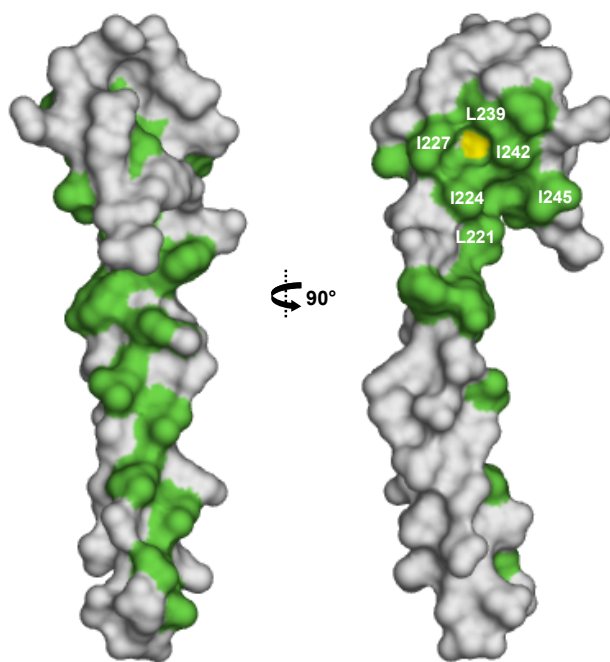

**Fig. 1.** Monomer A of EB1-C in surface representation. Conserved hydrophobic residue side chains engaged at the dimer interface are highlighted in green. Cys228 is shown in yellow.

#### **SUPPLEMENTARY REFERENCE**

Engh RA & Huber R (1991) Accurate bond and angle parameters for X-ray protein structure refinement. *Acta Cryst* **A47**: 392-400
